# Supplementary material for: Assessing the Efficacy of VLP-Based Vaccine against Epstein-Barr Virus Using a Rabbit Model
Source: MDPI journal article supplement (doi:10.3390/vaccines11030540), 2023-02-24
Supplement: s1 [file s1]

## **SUPPLEMENTARY INFORMATION**

### **Figure S1: Detection of EBV lytic gene BZLF1 in rabbit spleen**

Although no BZLF1 expressing cells were observed in the spleen sections of vaccinated rabbits (VIG), we did see occasional BZLF1 positive cell in the spleen of non-vaccinated animals (NVIG) (brown stained cell).

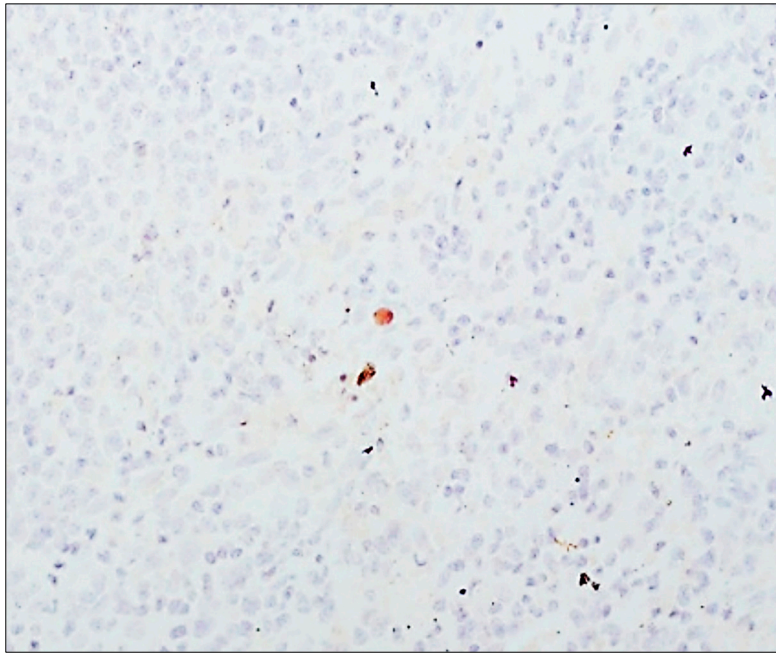

**Table S1: The list of primer sequences used to amplify genomic DNA from rabbit tissues.**

| Gene                     | Primer sequence                                        |
|--------------------------|--------------------------------------------------------|
| Marmoset $\beta$ -globin | F: 5' GAG GTT CTT TGA GTC CTT TGG 3'                   |
|                          | R: 5' CAT CAC TAA AGG CAC CGA GCA 3'                   |
| Rabbit GAPDH             | F: 5' GGA GAA AGC TGC TAA 3'                           |
|                          | R: 5' ACG ACC TGG TCC TCG GTG TA3'                     |
| EBV BamHI W              | F: 5' GCA GCC GCC CAG TCT CT 3'                        |
|                          | R: 5' ACA GAC AGT GCA CAG GAG CCT 3'                   |
|                          | Probe: 5' (6FAM) AAA AGC TGG CGC CCT TGC CTG(TAMRA) 3' |

**Table S2: List of primers for rabbit cellular transcripts and EBV genes.**

| Gene         | Primer sequence                 |
|--------------|---------------------------------|
| Rabbit GAPDH | F: 5' TGACGACATCAAGAAGGTGGTG 3' |
|              | R: 5' GAAGGTGGAGGAGTGGGTGTC 3'  |
| gp350        | F: 5' AGAATCTGGGCTGGGACGTT 3'   |
|              | R: 5' ACATGGAGCCCGGACAAGT 3'    |
| EBNA1        | F: 5' GGTCGTGGACGTGGAGAAAA 3'   |
|              | R: 5' GGTGGAGACCCGGATGATG 3'    |
| LMP2         | F: 5' ATGACTCATCTCAACACATA 3'   |
|              | R: 5' CATGTTAAGCAAATTGCAAA 3'   |
